# Supplementary material for: Data-based modelling and environmental sensitivity of vegetation in China
Source: Copernicus journal article supplement (doi:10.5194/bg-10-5817-2013), 2013-09-04
Supplement: Supplementary file 1 [file bg-10-5817-2013-supplement.pdf]

1 **Supplementary Figure:**

2 Elevation map of China (Farr et al. 2007), showing major geographic regions  
3 mentioned in the text.

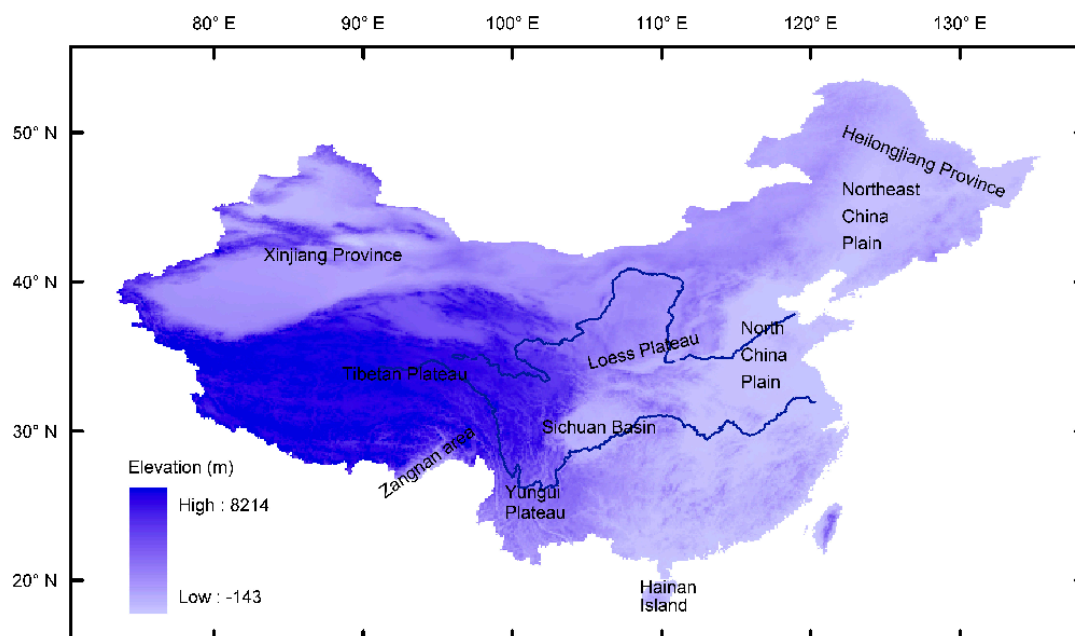

4

5 Farr, T., Rosen, P., Garo, E., Crippen, R., Duren, R., Hensley, S., Kobrick, M., Paller,  
6 M., Rodriguez, E., Roth, L., Seal, D., Shaffer, S., Shimada, J., Umland, J., Wener, M.,  
7 Oskin, M., Burbank, D., and Alsdorf, D.: The shuttle radar topography mission,  
8 *Reviews of Geophysics*, 45, RG2004, 2007.

9
